# Supplementary material
Source: Springer Nature journal article supplement (https://www.springermedizin.de/resource/supplementary/12885_2014_4763_MOESM7_ESM.pdf/9467204)

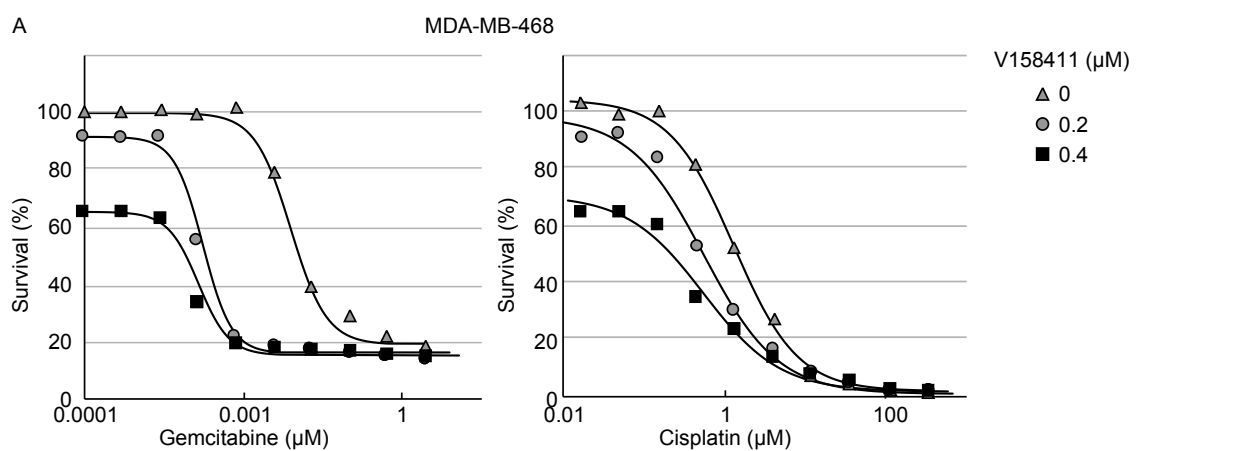

**B**

| Cell Line                        | BT474                     | MCF7 | HCC1937             | MDA-MB-157 | MDA-MB-231 | MDA-MB-468 |
|----------------------------------|---------------------------|------|---------------------|------------|------------|------------|
| Tumour Type                      | Luminal                   |      |                     | Basal      |            |            |
| p53 Status                       | Mut                       | WT   | Mut                 | Mut        | Mut        | Mut        |
| Cytotoxic                        | V158411 ( $\mu\text{M}$ ) |      | Potentiation Factor |            |            |            |
| Gemcitabine<br>(anti-metabolite) | 0.1                       |      |                     | 3.9        | 4.4        | 10.7       |
|                                  | 0.2                       | 9.9  |                     | 7.6        | 13.4       | 29.2       |
|                                  | 0.4                       | 7.5  |                     | 8.6        | 6.4        | 16.8       |
|                                  | 0.8                       | 6.6  | 1.0                 |            |            |            |
| Cisplatin<br>(DNA alkylation)    | 0.1                       |      |                     | 4.3        | 2.1        | 2.1        |
|                                  | 0.2                       | 2.6  |                     | 7.0        | 4.6        | 2.4        |
|                                  | 0.4                       | 2.5  |                     | 16.0       | 6.1        | 2.6        |
|                                  | 0.8                       | 2.0  | 0.9                 |            |            |            |

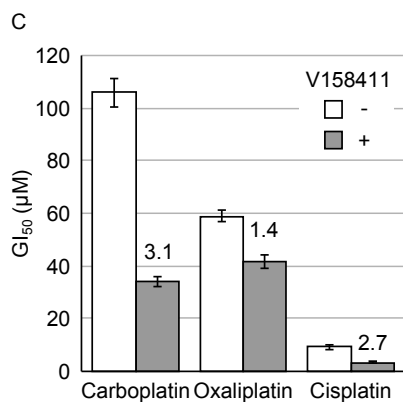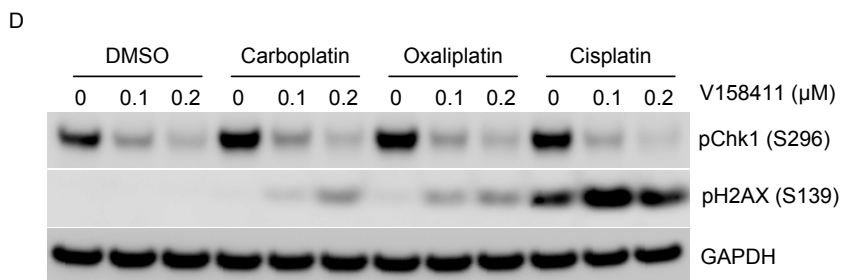

Supplement: MOESM7 [file 9467204]
